# Supplementary material for: Colorimetric and fluorescent detection of GSH with the assistance of CTAB micelles
Source: Royal Society of Chemistry journal article supplement (doi:10.1039/c5ra07777j), 2015-01-01
Supplement: c5ra07777j1.pdf [file c5ra07777j1.pdf]

# Colorimetric and fluorescent detection of GSH with the assistance of CTAB micelles

Lun Song,<sup>a</sup> Haiyu Tian,<sup>a</sup> Xiaoliang Pei,<sup>a</sup> Ziyou Zhang,<sup>a</sup> Weibing Zhang<sup>\*a</sup> and Junhong Qian<sup>\*ab</sup>

<sup>a</sup>Shanghai Key Laboratory of Functional Materials Chemistry, School of Chemistry and Molecular Engineering,  
East China University of Science and Technology, Shanghai, 200237, China

<sup>b</sup>Shanghai Key Laboratory of Chemical Biology, School of Pharmacy, East China University of Science and  
Technology, Shanghai, 200237, China

junhongqian@ecust.edu.cn, weibingzhang@ecust.edu.cn

## Supporting Information

### Contents

|                                                                      |    |
|----------------------------------------------------------------------|----|
| Experimental-----                                                    | 2  |
| NMR and ESI-MS spectra of <b>IM1-2</b> and <b>STP1-2</b> -----       | 4  |
| The solubility of <b>STP1-2</b> in PBS-----                          | 7  |
| Time-dependent UV-vis spectra of <b>STP1</b> -thiols-----            | 8  |
| The selectivity of <b>STP2</b> toward GSH-----                       | 9  |
| The competition and selectivity of <b>STP1/STP2</b> -----            | 10 |
| GSH titration to <b>STP2</b> solution-----                           | 12 |
| OVA titration to <b>STP1</b> solution-----                           | 13 |
| Fluorescent imaging of Hela cells with <b>STP2</b> as the probe----- | 14 |

## Experimental

### Synthesis

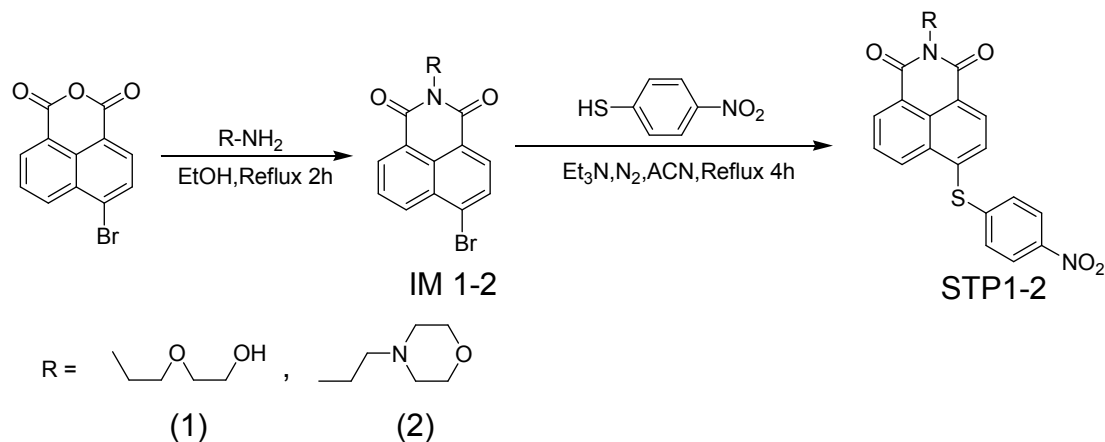

Scheme S1 The synthesis procedure of STP1 and STP2

#### The synthesis of IM 1-2:

A mixture of 4-bromo-1,8-naphthalic anhydride (5 g, 18 mmol) and 18 mmol of 2-(2-aminoethoxy)ethanol/N-(2-Aminoethyl)morpholine in 100 mL ethanol was refluxed under a nitrogen atmosphere for 2 h. After kept at the room temperature for 12 h, the precipitate was collected and recrystallized with ethanol.

**IM1** was obtained as white powder (5.23 g, yield 80%),  $^1\text{H}$  NMR, (400 Hz,  $\text{CDCl}_3$ ),  $\delta$  (ppm): 8.66 (d,  $J = 7.3$  Hz, 1H), 8.58 (d,  $J = 8.5$ , 1H), 8.42 (d,  $J = 7.9$ , 1H), 8.04 (d,  $J = 7.9$ , 1H), 7.86 (t,  $J = 7.6$ , 1H), 4.45 (t,  $J = 5.6$ , 2H), 3.87 (t,  $J = 5.6$ , 2H), 3.64-3.72 (m, 4H), 2.42 (s, 1H). **IM2**: white powder (5.45 g, yield: 78%),  $^1\text{H}$  NMR, (400 Hz, DMSO),  $\delta$  (ppm): 8.48-8.60 (m, 2H), 8.31 (d,  $J = 7.8$ , 1H), 8.20 (d,  $J = 7.8$ , 1H), 8.00 (t,  $J = 7.7$ , 1H), 4.17 (t,  $J = 6.6$ , 2H), 3.53 (s, 4H), 2.58 (t,  $J = 6.7$ , 2H), 2.47 (s, 2H).

#### The synthesis of STP1-2

**STP1**: 363 mg of IM1 (1.0 mmol) was dissolved in 100 mL acetonitrile, 4-nitrothiophenol (2.0 mmol, 310 mg) and 6 drops of  $\text{Et}_3\text{N}$  were added to the above acetonitrile solution. The mixture was stirred at room temperature for 1 h, followed by refluxed for 4 h. After evaporated the solvent, the residue was purified by column chromatography on silica (DCM/MeOH = 50/1 as eluent) to give **STP1** as light yellow powder (302 mg, yield 69%).  $^1\text{H}$  NMR (400 MHz,  $\text{CDCl}_3$ ),  $\delta$  (ppm): 8.68 (dd,

J = 6.4, 2H), 8.61 (dd, J = 7.6, 1H), 8.58(d, J = 7.6, 1H), 8.14 (t, J = 2.6, 1H), 8.11 (t, J = 2.0, 1H), 7.92(s, J = 7.7, 1H), 7.78-7.84 (m, 1H), 7.30 (t, J = 2.6, 1H), 7.27 (t, J = 2.0, 1H), 4.47 (t, J = 5.5, 2H), 3.88 (t, J = 5.5, 2H), 3.65-3.73 (m, 4H), 2.43 (s, 1H). <sup>13</sup>C NMR (400 MHz, CDCl<sub>3</sub>), δ(ppm): 163.93, 163.79, 146.42, 144.55, 137.58, 133.16, 132.24, 131.72, 131.33, 130.99, 128.98, 128.87, 128.19, 124.51, 123.46, 123.31, 72.23, 68.35, 61.83, 39.68. HRMS (ESI) m/z: found 461.0781, calcul for C<sub>22</sub>H<sub>18</sub>N<sub>2</sub>O<sub>6</sub>S (M+Na)<sup>+</sup>: 461.0783.

**STP2** was obtained by the same procedure with IM2 instead of IM1 (light yellow powder, 24 mg, yield: 70%). <sup>1</sup>H NMR (400 MHz, CDCl<sub>3</sub>), δ (ppm): 8.67 (dd, J = 6.3, 1H), 8.61 (dd, J = 7.6, 1H), 8.57 (d, J = 7.6, 1H), 8.14 (t, J = 2.6, 1H), 8.11 (t, J = 2.0, 1H), 7.39 (d, J = 7.6, 1H), 7.78-7.95 (m, 1H), 7.30 (t, J = 2.6, 1H), 7.28 (t, J = 2.0, 1H), 4.36(t, J = 6.8, 2H), 3.69 (t, J = 4.5, 4H), 2.73 (t, J = 6.9, H), 2.56-2.64(m, 4H). <sup>13</sup>C NMR(400MHz, CDCl<sub>3</sub>), δ(ppm): 163.64, 163.50, 146.42, 144.63, 137.36, 133.20, 132.06, 131.79, 131.20, 130.80, 129.00, 128.87, 128.19, 124.52, 123.66, 123.50, 67.05, 56.13, 53.83, 37.40. HRMS (ESI m/z, calcd for C<sub>24</sub>H<sub>21</sub>N<sub>3</sub>O<sub>5</sub>S (M+H)<sup>+</sup>: 464.1280, found 464.1279.

### **Determination of the detection limit**

The detection limit (LOD) was obtained by  $3S_b/k$ , where  $S_b$  is the standard deviation of 10 blank measurements, and k is the slope of the fitted line.

### **Living cell culture and fluorescence imaging**

HeLa cells were cultured in Dulbecco's modified Eagle's medium (DMEM) supplemented with 10% fetal bovine serum (FBS) at 37 °C and under 5% CO<sub>2</sub> in a CO<sub>2</sub> incubator. The cells were washed with phosphate buffered solution (PBS) and then incubated with STP1/ STP2 (15 μM) in DMEM for 90 min at 37 °C and washed 3 times with PBS. For the control experiment, the cells were pretreated with 0.5 mM maleimide (or GSH) for 30 min followed by incubated with 15 μM of **STP1/ STP2** for 90 min. Cell imaging was carried out after washing cells with PBS for 3 times. Emission was collected at 460–480 nm for the blue channel, and the excitation wavelength was set at 404 nm.

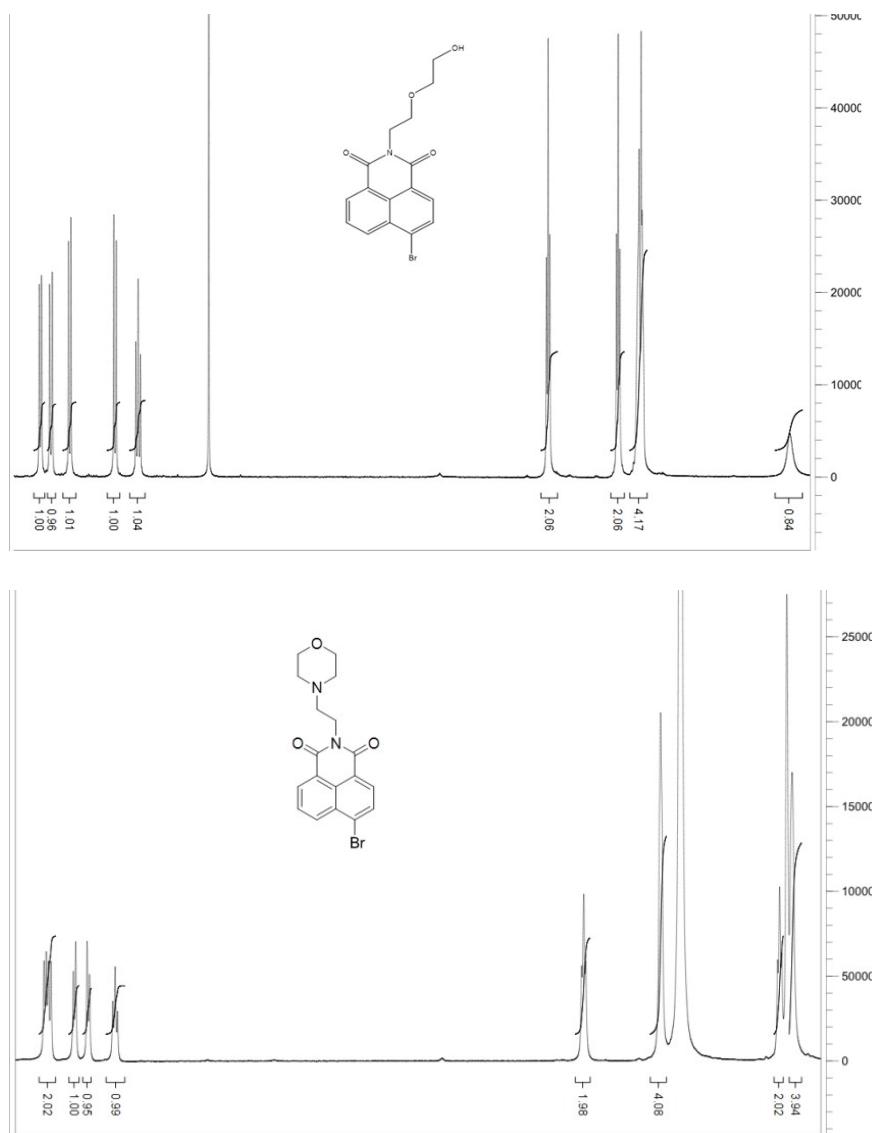

**Fig. S1** <sup>1</sup>H NMR spectra of **IM1** (top) and **IM2** (bottom).

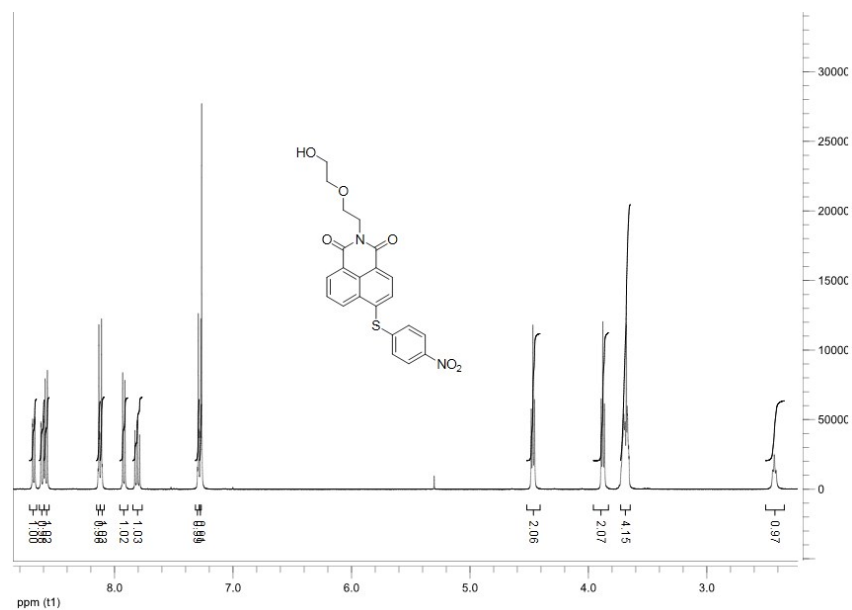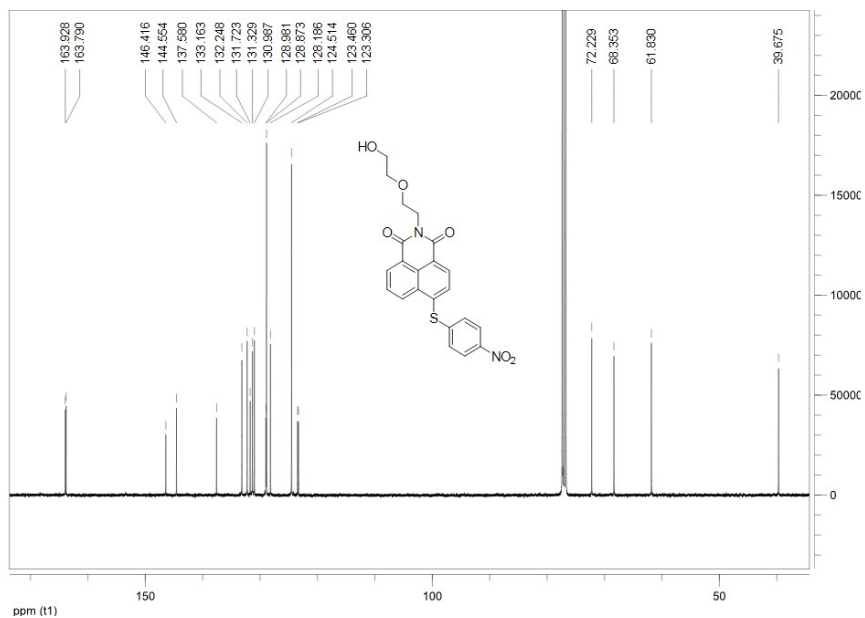

Monoisotopic Mass, Even Electron Ions  
 545 formula(e) evaluated with 26 results within limits (up to 1 best isotopic matches for each mass)  
 Elements Used:  
 C: 0-54 H: 0-50 N: 1-3 O: 0-6 S: 0-2 Na: 0-1

ZHANG-WB

ECUST Institute of Fine Chem

05-Sep-2014  
 17:43:26  
 1: TOF MS ES+  
 1.49e+004

WB-SL-89 161 (1.084) Cm (152:175)

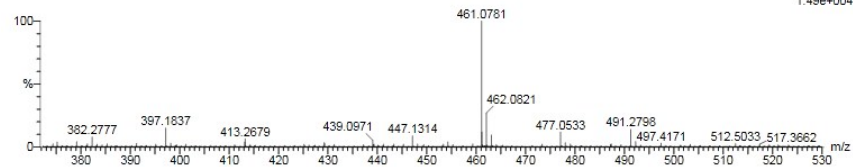

Minimum: -1.5  
 Maximum: 100.0

| Mass     | Calc. Mass | mDa  | PPM  | DBE  | i-FIT | i-FIT (Norm) | Formula            |
|----------|------------|------|------|------|-------|--------------|--------------------|
| 461.0781 | 461.0783   | -0.2 | -0.4 | 14.5 | 239.8 | 0.0          | C22 H18 N2 O6 S Na |

**Fig. S2**  $^1\text{H}$  NMR,  $^{13}\text{C}$  NMR and ESI spectra of STP1

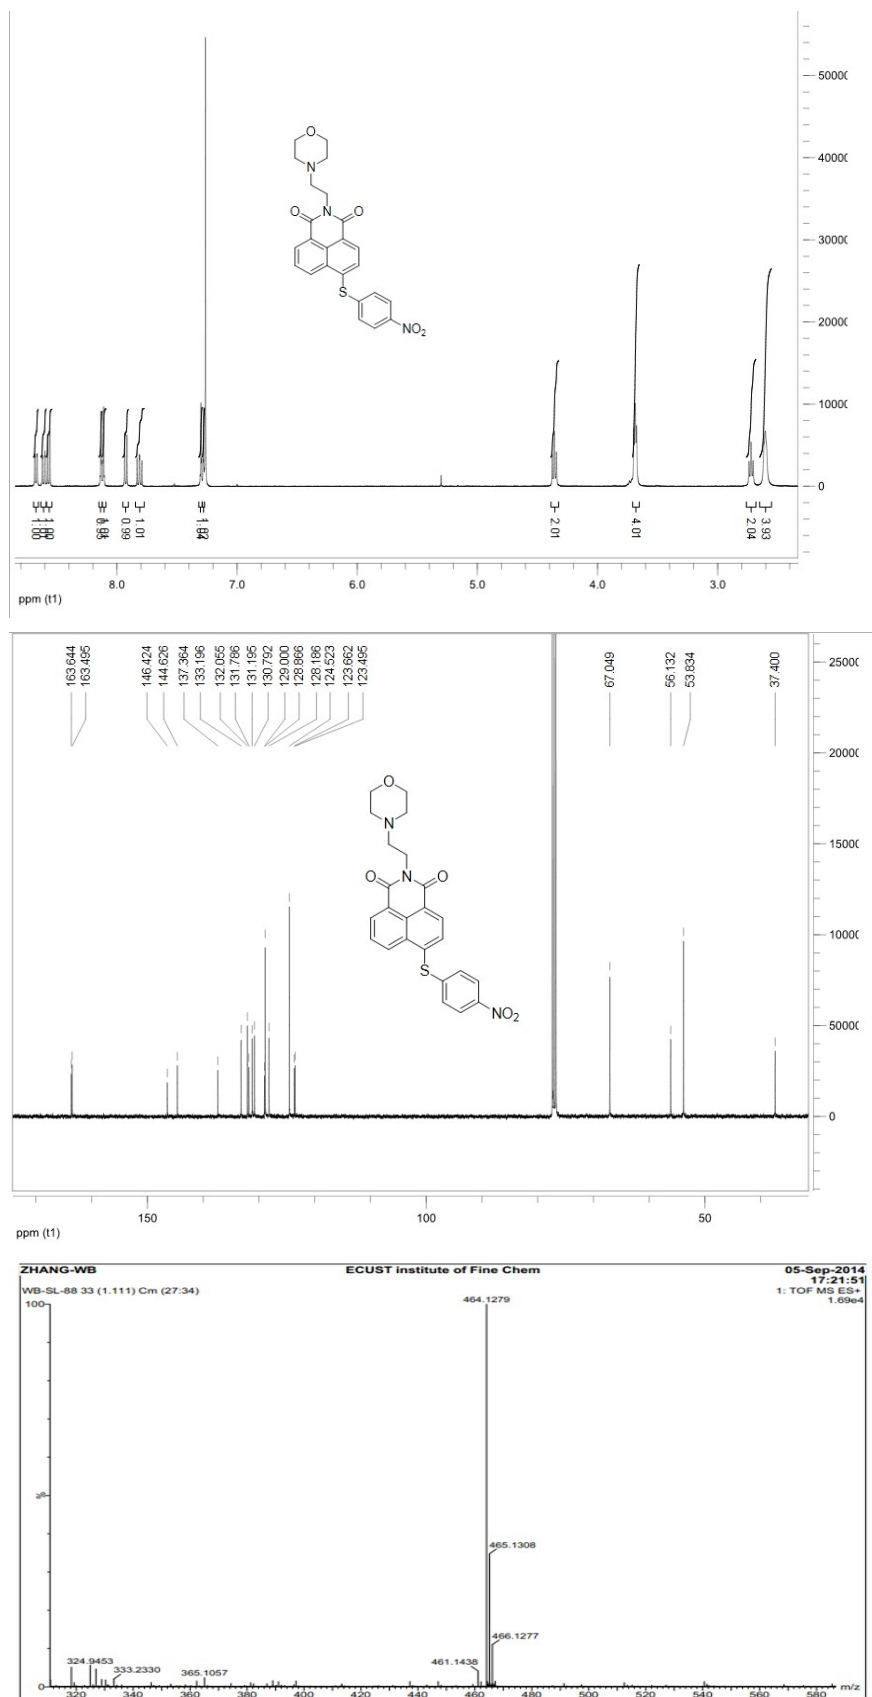

Fig. S3 <sup>1</sup>H NMR, <sup>13</sup>C NMR and ESI spectra of STP2

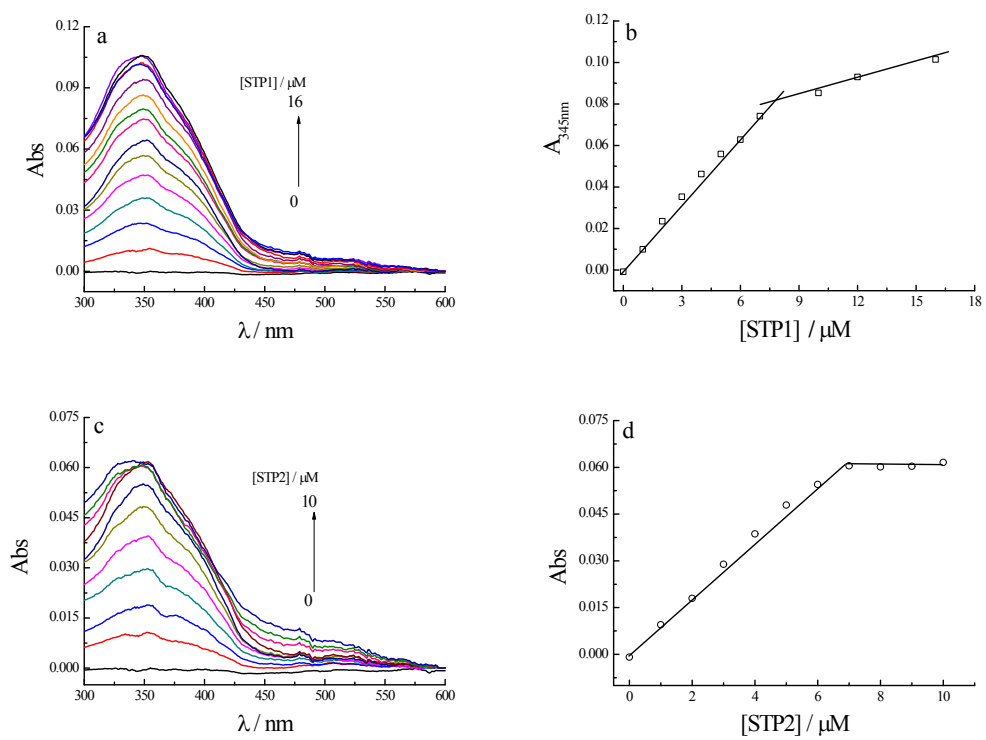

**Fig. S4** The concentration-dependent absorption spectra of **STP1** (a) and **STP2** (c) and the absorbance of **STP1** (b) /**STP2** (d) as a function of the concentration in PBS (20 mM, pH 7.4),  $\lambda_{\text{ab}} = 345 \text{ nm}$ , 25  $^{\circ}\text{C}$ .

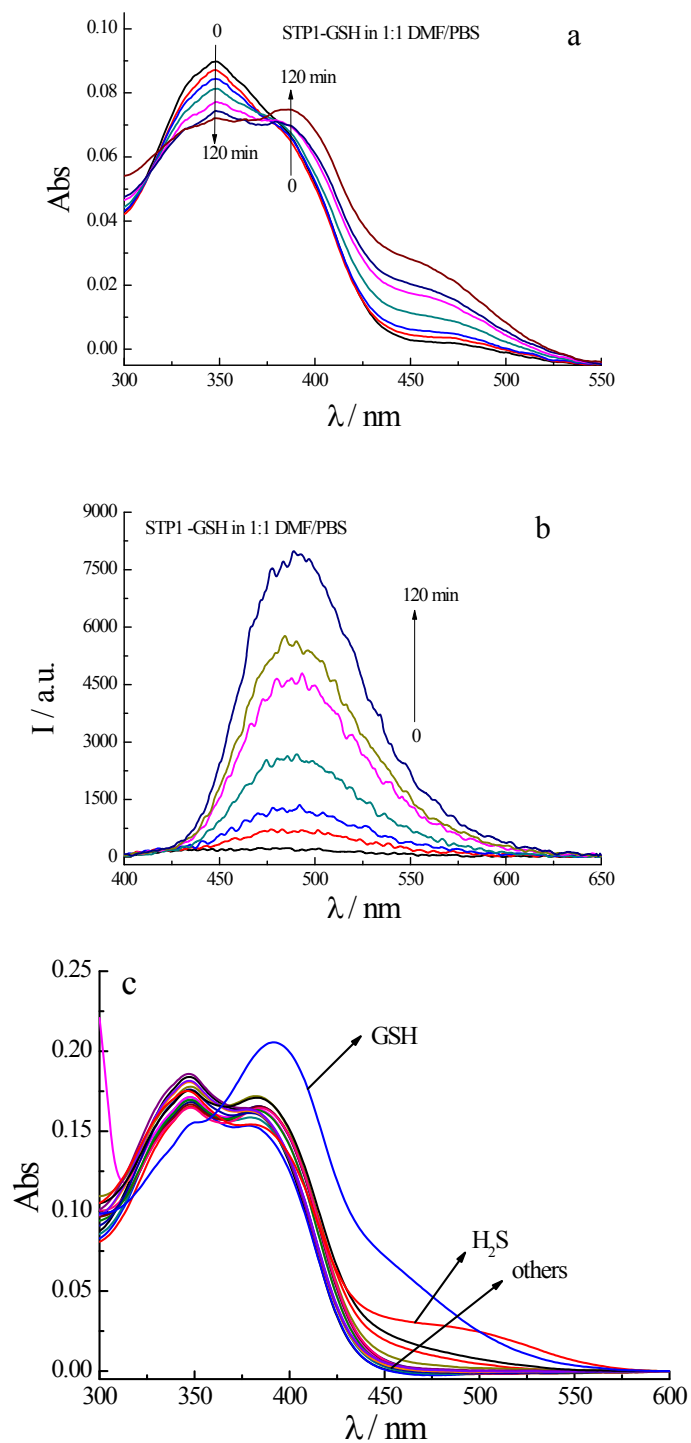

**Fig. S5** Time-dependent UV-vis (a) and fluorescence (b,  $\lambda_{\text{ex}} = 375 \text{ nm}$ ) spectra of **STP1** (15  $\mu\text{M}$ ) in the presence of 5 mM GSH in 1:1 DMF/PBS (20 mM, pH 7.4), 37°C. (c) The absorption spectrum of **STP1** in the presence of different additives in 1 mM CTAB-PBS (20 mM, pH 7.4), 37°C.



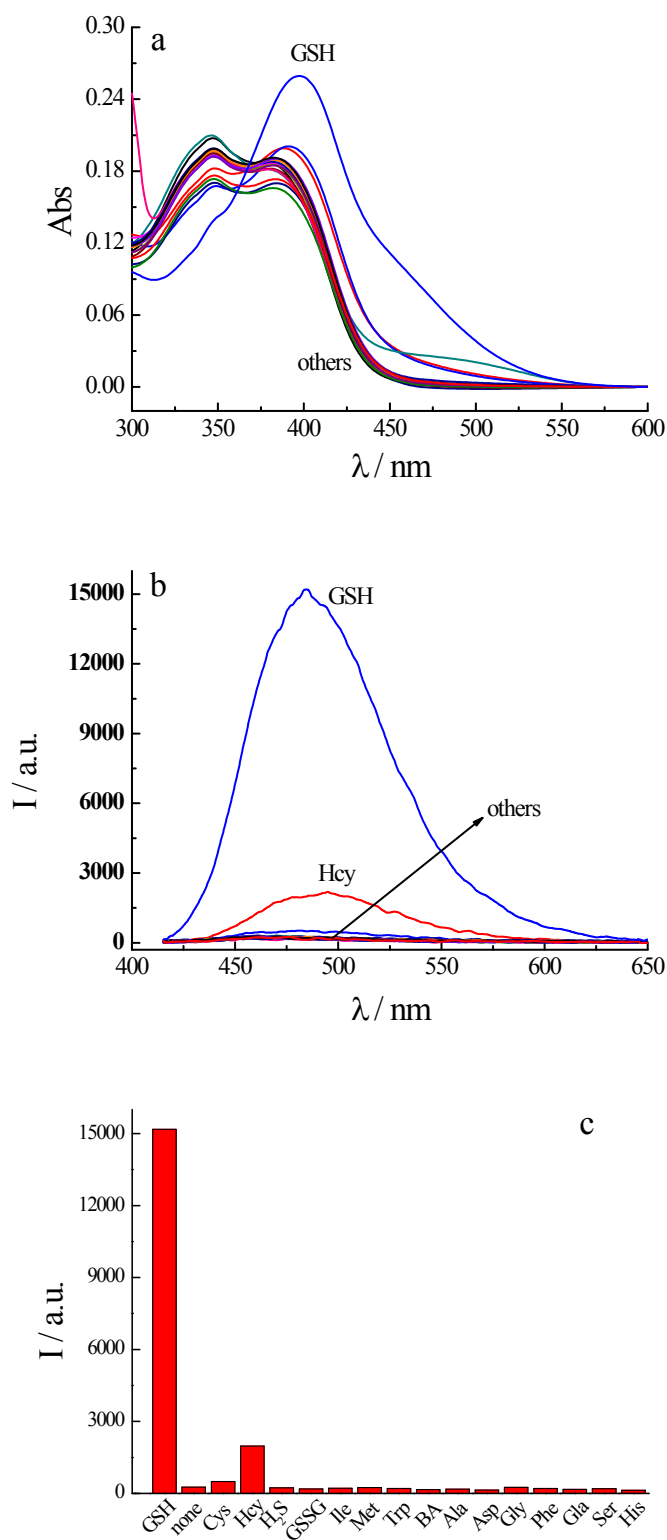

**Fig. S6** The absorption (a) and emission (b,  $\lambda_{\text{ex}} = 390$  nm) spectra and the fluorescence intensity at 490 nm (c) of **STP2** (15  $\mu\text{M}$ ) in the presence of different additives including GSH, Ile, Cys, n-butylamine, Hcy, Gly, Ser, Met, GSSG, Trp, Ala, Asp, Phe, Glu, His, H<sub>2</sub>S. [analyte] = 300  $\mu\text{M}$ , recorded 90 min after the addition of the reagent.

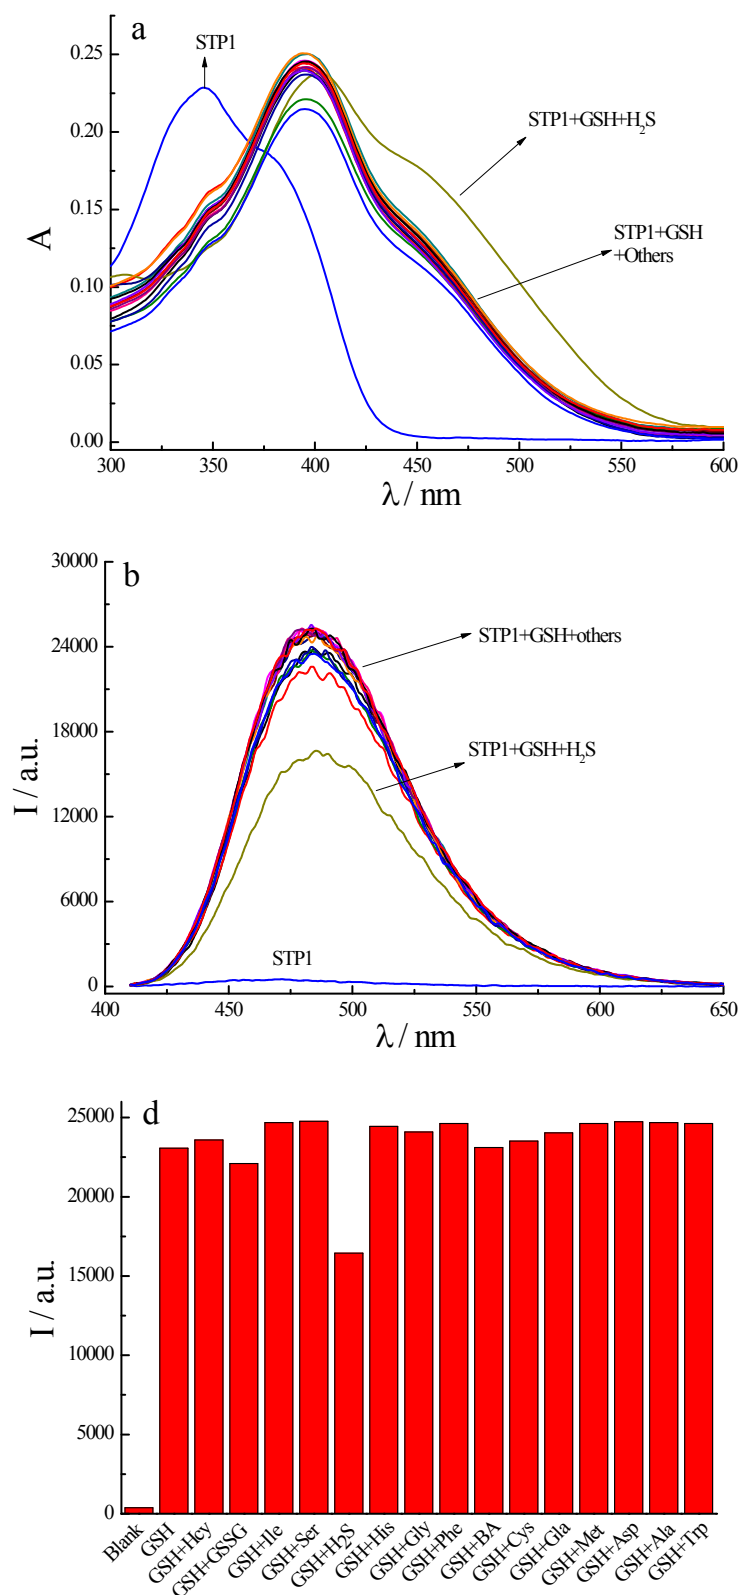

Fig. S7 The absorption (a) and emission (b) spectra of **STP1**-GSH in the presence of 300  $\mu$ M different additives in 1 mM CTAB-PBS (20 mM, pH 7.4). [**STP1**] = 15  $\mu$ M, [GSH] = 300  $\mu$ M, additives: Hcy, GSSG, Ile, Ser, H<sub>2</sub>S, His, Gly, Phe, BA, Cys, Gla, Met, Asp, Ala, Trp;  $\lambda_{\text{ex}}$  = 390 nm.

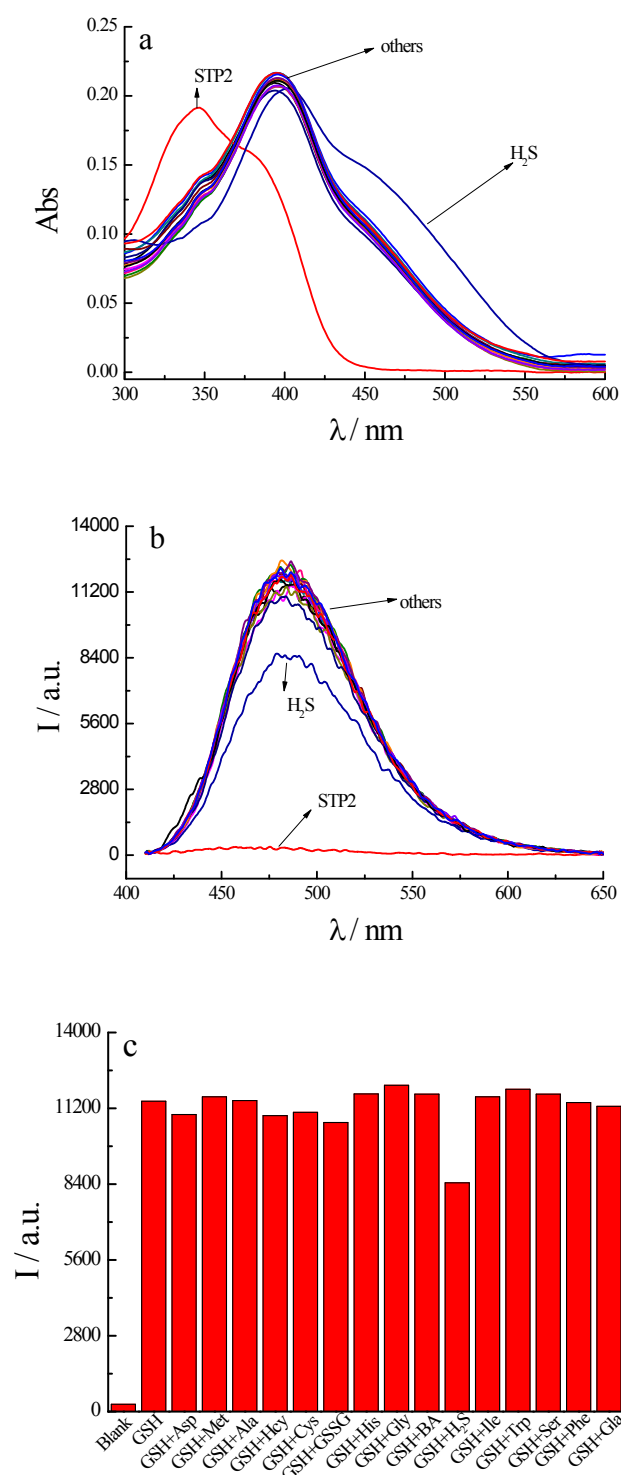

**Fig. S8** The absorption (a), emission (b) spectra and the fluorescence intensity at 490 nm (c) of STP2-GSH in the presence of 300  $\mu$ M different additives in 1 mM CTAB-PBS (20 mM, pH 7.4). [STP1] = 15  $\mu$ M, [GSH] = 300  $\mu$ M, additives: Hcy, GSSG, Ile, Ser, H<sub>2</sub>S, His, Gly, Phe, BA, Cys, Gla, Met, Asp, Ala, Trp;  $\lambda_{\text{ex}}$  = 390 nm, 37°C.

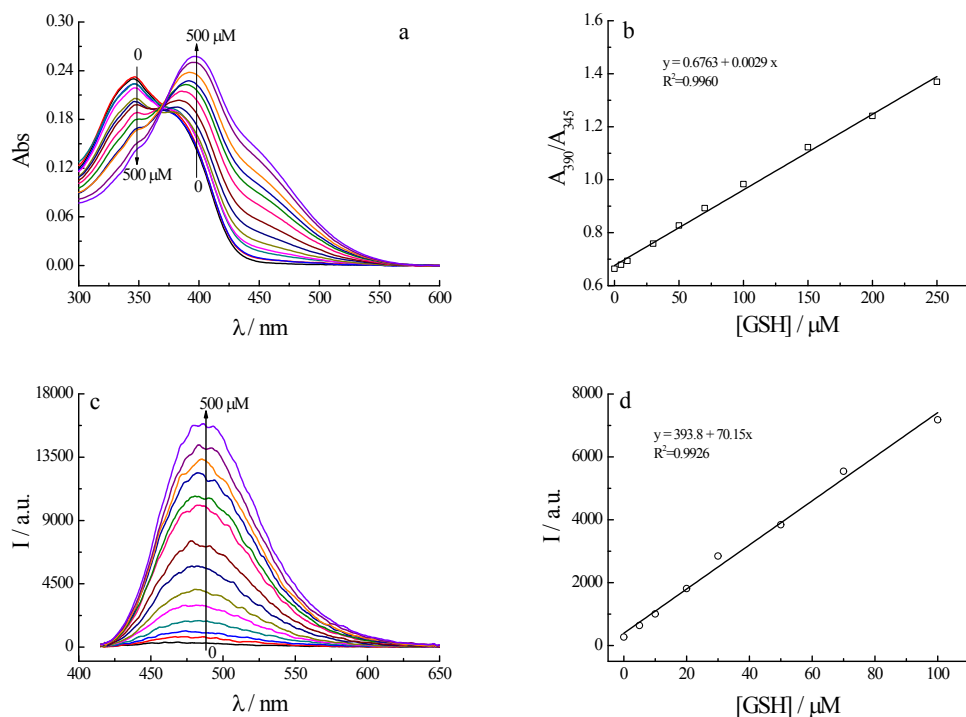

**Fig. S9** The absorption (a) and the fluorescence (c) spectra of **STP2** with different concentrations of GSH, and the ratio of  $A_{390}$  and  $A_{345}$  (b) and fluorescence intensity  $I_{490}$  (d) of **STP2** as a function of GSH concentration. 1 mM CTAB-PBS (20 mM, pH 7.4), equilibrated at 37 °C for 90 min,  $[\text{STP2}] = 15 \mu\text{M}$ ,  $\lambda_{\text{ex}} = 390 \text{ nm}$ .

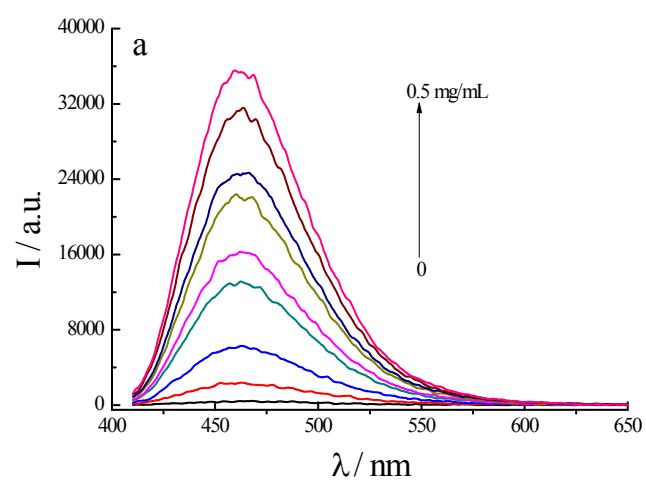

**Fig. S10** The fluorescence spectra (a) of **STP1** with different concentrations of OVA in 1 mM CTAB-PBS (20 mM, pH 7.4),  $\lambda_{\text{ex}} = 390 \text{ nm}$ ,  $[\text{STP1}] = 15 \mu\text{M}$ ,  $37^\circ\text{C}$ , each time recorded 90 min after the addition of the OVA.

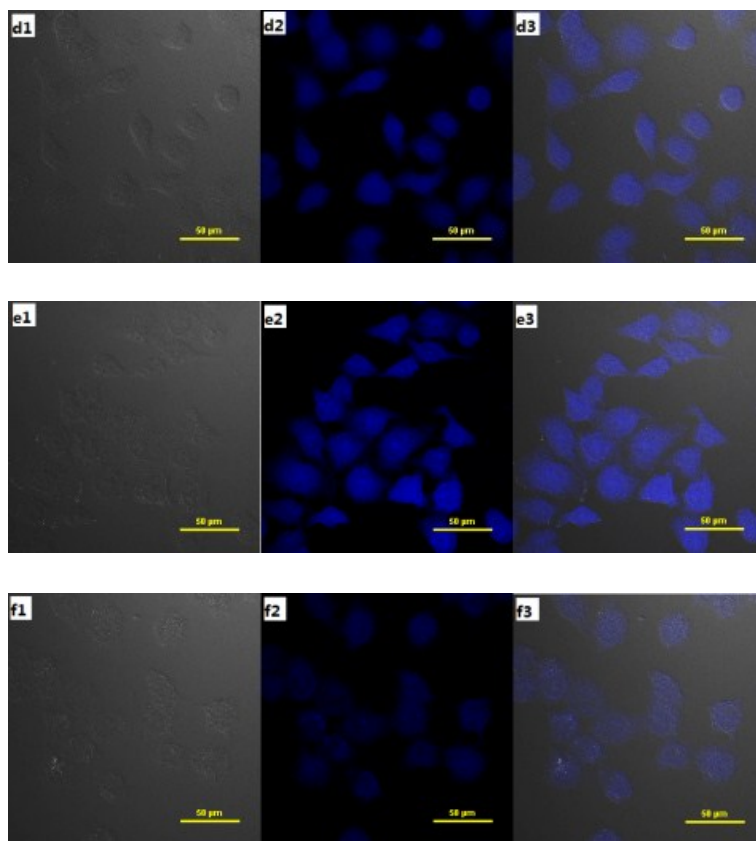

**Fig. S11** Fluorescence images of HeLa cells incubated with 15  $\mu$ M **STP2** at 37  $^{\circ}$ C. **1**: bright field images; **2**: fluorescence images at the blue channel; **3**: the merged images of **1** and **2**. **d**: HeLa cells incubated with **STP2** for 90 min; **e**: HeLa cells pretreated with 0.5 mM GSH for 30 min followed by incubated with **STP2** for 90 min; **f**: HeLa cells pretreated with 0.5 mM NME for 30 min, then incubated with **STP2** for 90 min.  $\lambda_{\text{ex}} = 404$  nm, 1 mM CTAB-PBS (20 mM, pH 7.4).
